# Supplementary material
Source: publisher figshare collection journal article supplement (https://tandf.figshare.com/ndownloader/files/15085568)
Supplement: Supplementary file [file 15085568]

Supplementary data

Appendix 1. Codes from the International Classification of Diseases, 10th edition (ICD-10), used to identify study outcomes in the Danish National Registry of Patients

| Study outcome                                                          | ICD-10 codes                                                                                                                           |
|------------------------------------------------------------------------|----------------------------------------------------------------------------------------------------------------------------------------|
| Venous thromboembolism, deep venous thrombosis, and pulmonary embolism | I26, I80.1–I80.9 and I82.1–I82.9                                                                                                       |
| Intracranial bleeding                                                  | I60- I62, I690–I692 and S064–S066                                                                                                      |
| Gastrointestinal bleeding                                              | K25.0, K25.2, K25.4, K25.6, K26.0, K26.2, K26.4, K26.6, K27.0, K27.2, K27.4, K27.6, K28.0, K28.2, K28.4, K28.6, K29.0, and K92.0–K92.2 |
| Urinary/lung bleeding                                                  | J942, N02, R04, R31                                                                                                                    |
